# Supplementary material
Source: publisher figshare collection journal article supplement (https://acs.figshare.com/ndownloader/files/4145977)
Supplement: Supplementary file 1 [file 4145977]

## Supporting Information

### **Synthesis, Structural Elucidation and Diffusion-Ordered NMR studies of Homoleptic Alkyl Lithium Magnesiates: Donor-Controlled Structural Variations in Mixed-Metal Chemistry**

Sharon E. Baillie,<sup>†</sup> William Clegg,<sup>‡</sup> Pablo García-Álvarez,<sup>§</sup> Eva Hevia,<sup>\*,†</sup> Alan R. Kennedy,<sup>†</sup> Jan Klett<sup>†</sup> and Luca Russo<sup>‡</sup>

<sup>†</sup> *WestCHEM, Department of Pure and Applied Chemistry, University of Strathclyde, Glasgow, UK, G1 1XL*

<sup>‡</sup> *School of Chemistry, Newcastle University, Newcastle upon Tyne, UK, NE1 7RU*

<sup>§</sup> *Departamento de Química Orgánica e Inorgánica-IUQOEM, Universidad de Oviedo-CSIC, E-33071 Oviedo, Spain*

**Table S1: Key crystallographic and refinement parameters for compounds 2–7**

|                                                                          | 2                                                     | 3                                                                  | 4                                                    | 5                                                                                | 6                                                                  | 7                                                                                                 |
|--------------------------------------------------------------------------|-------------------------------------------------------|--------------------------------------------------------------------|------------------------------------------------------|----------------------------------------------------------------------------------|--------------------------------------------------------------------|---------------------------------------------------------------------------------------------------|
| Empirical formula                                                        | C <sub>16</sub> H <sub>40</sub> LiMgOSi <sub>3</sub>  | C <sub>20</sub> H <sub>49</sub> LiMgO <sub>4</sub> Si <sub>3</sub> | C <sub>14</sub> H <sub>37</sub> LiMgOSi <sub>3</sub> | C <sub>28</sub> H <sub>76</sub> Li <sub>2</sub> MgN <sub>4</sub> Si <sub>4</sub> | C <sub>21</sub> H <sub>56</sub> LiMgN <sub>3</sub> Si <sub>3</sub> | C <sub>58</sub> H <sub>156</sub> Li <sub>2</sub> Mg <sub>4</sub> N <sub>6</sub> OSi <sub>10</sub> |
| <i>M<sub>r</sub></i>                                                     | 364.3                                                 | 469.1                                                              | 337.0                                                | 619.5                                                                            | 466.2                                                              | 1345.9                                                                                            |
| Cryst size (mm)                                                          | 0.5 × 0.4 × 0.3                                       | 0.44 × 0.38 × 0.24                                                 | 0.32 × 0.26 × 0.03                                   | 0.42 × 0.26 × 0.08                                                               | 0.20 × 0.16 × 0.14                                                 | 0.28 × 0.25 × 0.12                                                                                |
| Cryst syst                                                               | Orthorhombic                                          | Triclinic                                                          | Triclinic                                            | Tetragonal                                                                       | Monoclinic                                                         | Monoclinic                                                                                        |
| Space group                                                              | <i>P</i> 2 <sub>1</sub> 2 <sub>1</sub> 2 <sub>1</sub> | <i>P</i> $\bar{1}$                                                 | <i>P</i> $\bar{1}$                                   | <i>P</i> 4 <sub>3</sub> 2 <sub>1</sub> 2                                         | <i>P</i> 2 <sub>1</sub> / <i>n</i>                                 | <i>P</i> 2 <sub>1</sub> / <i>c</i>                                                                |
| <i>a</i> (Å)                                                             | 30.8877(9)                                            | 9.6476(5)                                                          | 12.6467(7)                                           | 11.1275(7)                                                                       | 9.8686(3)                                                          | 14.1664(5)                                                                                        |
| <i>b</i> (Å)                                                             | 12.9370(2)                                            | 11.0862(6)                                                         | 12.7597(7)                                           |                                                                                  | 16.9877(7)                                                         | 30.7009(9)                                                                                        |
| <i>c</i> (Å)                                                             | 18.9561(3)                                            | 15.5535(6)                                                         | 15.1259(8)                                           | 36.035(5)                                                                        | 19.5686(8)                                                         | 21.7025(7)                                                                                        |
| $\alpha$ (deg)                                                           |                                                       | 104.171(4)                                                         | 80.209(4)                                            |                                                                                  |                                                                    |                                                                                                   |
| $\beta$ (deg)                                                            |                                                       | 96.327(4)                                                          | 69.849(5)                                            |                                                                                  | 97.643(3)                                                          | 95.679(3)                                                                                         |
| $\gamma$ (deg)                                                           |                                                       | 111.437(5)                                                         | 79.137(4)                                            |                                                                                  |                                                                    |                                                                                                   |
| <i>V</i> (Å <sup>3</sup> )                                               | 7574.7(3)                                             | 1464.12(12)                                                        | 2235.7(2)                                            | 4461.9(7)                                                                        | 3251.4(2)                                                          | 9392.6(5)                                                                                         |
| <i>Z</i>                                                                 | 12                                                    | 2                                                                  | 4                                                    | 4                                                                                | 4                                                                  | 4                                                                                                 |
| $\mu$ (mm <sup>-1</sup> )                                                | 0.212                                                 | 0.203                                                              | 0.235                                                | 0.167                                                                            | 0.176                                                              | 0.199                                                                                             |
| Trans coeff range                                                        | 0.877–1.000                                           | 0.916–0.953                                                        | 0.929–0.993                                          | 0.933–0.987                                                                      | 0.887–1.000                                                        | 0.946–0.977                                                                                       |
| <i>T</i> (K)                                                             | 123                                                   | 150                                                                | 150                                                  | 150                                                                              | 123                                                                | 150                                                                                               |
| Reflns measd                                                             | 33974                                                 | 9680                                                               | 15192                                                | 9197                                                                             | 27494                                                              | 64952                                                                                             |
| Unique reflns                                                            | 14461                                                 | 5839                                                               | 9068                                                 | 4486                                                                             | 9417                                                               | 20427                                                                                             |
| <i>R</i> <sub>int</sub>                                                  | 0.0488                                                | 0.0181                                                             | 0.0365                                               | 0.0648                                                                           | 0.0441                                                             | 0.0437                                                                                            |
| Reflns with <i>F</i> <sup>2</sup> > 2σ                                   | 11908                                                 | 4761                                                               | 4852                                                 | 1571                                                                             | 5767                                                               | 11406                                                                                             |
| Refined params                                                           | 664                                                   | 323                                                                | 415                                                  | 199                                                                              | 269                                                                | 877                                                                                               |
| <i>R</i> (on <i>F</i> , <i>F</i> <sup>2</sup> > 2σ) <sup>a</sup>         | 0.0845                                                | 0.0340                                                             | 0.0355                                               | 0.0478                                                                           | 0.0469                                                             | 0.0386                                                                                            |
| <i>R</i> <sub>w</sub> (on <i>F</i> <sup>2</sup> , all data) <sup>a</sup> | 0.1763                                                | 0.0936                                                             | 0.0643                                               | 0.0991                                                                           | 0.1178                                                             | 0.0861                                                                                            |
| Goodness of fit <i>S</i> <sup>a</sup>                                    | 1.147                                                 | 1.079                                                              | 0.688                                                | 0.695                                                                            | 0.937                                                              | 0.853                                                                                             |
| Max, min electron density (e Å <sup>-3</sup> )                           | 0.56, −0.48                                           | 0.42, −0.34                                                        | 0.23, −0.20                                          | 0.29, −0.23                                                                      | 0.48, −0.46                                                        | 0.47, −0.25                                                                                       |

<sup>a</sup>Conventional  $R = \sum ||F_o| - |F_c|| / \sum |F_o|$ ;  $R_w = [\sum w(F_o^2 - F_c^2)^2 / \sum w(F_o^2)^2]^{1/2}$ ;  $S = [\sum w(F_o^2 - F_c^2)^2 / (\text{no. data} - \text{no. params})]^{1/2}$  for all data

**[LiMgR<sub>3</sub>] (1)**<sup>1</sup>H NMR spectrum of **1** in C<sub>6</sub>D<sub>6</sub> solution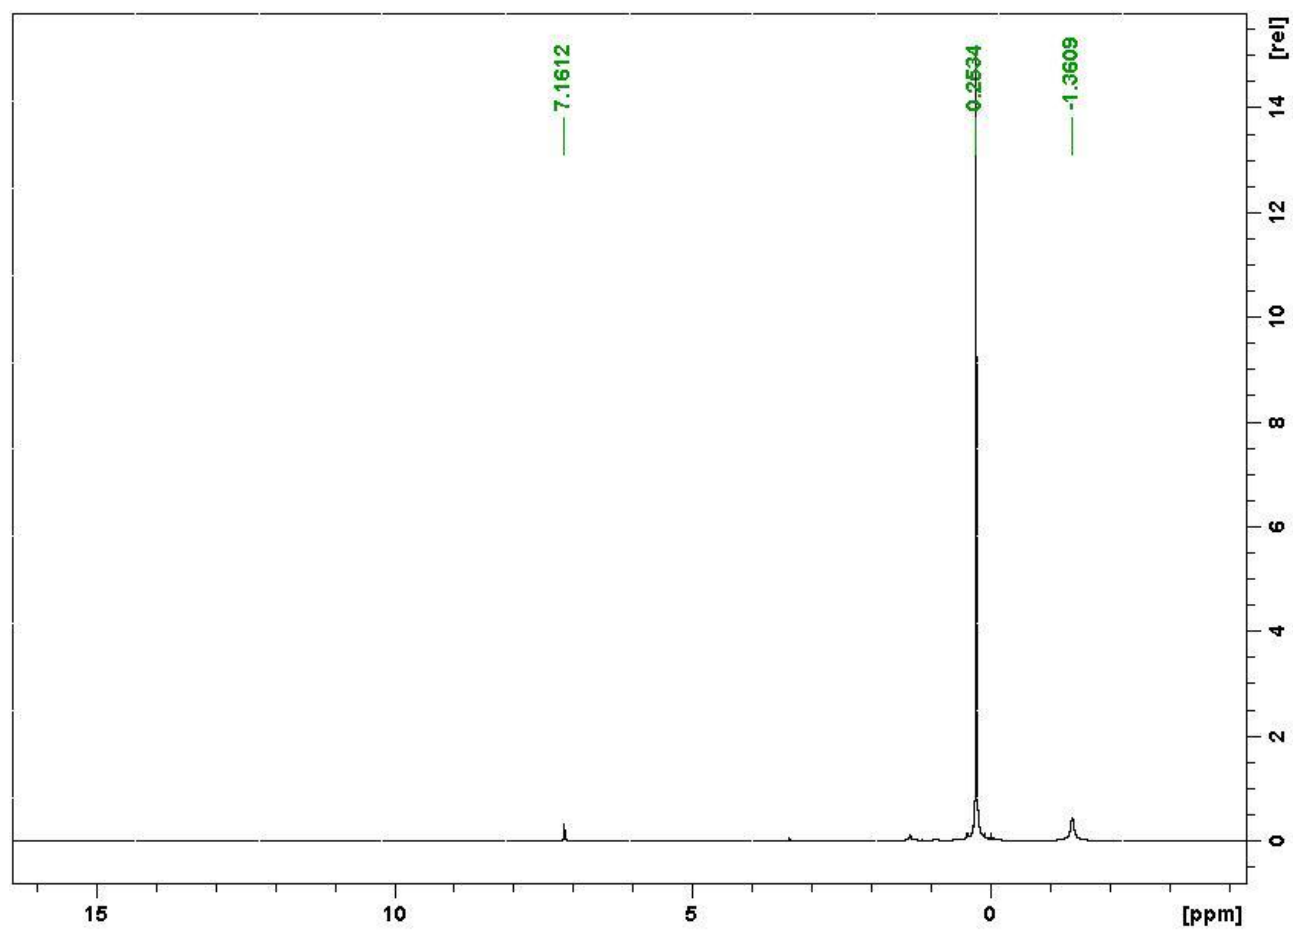**Figure S 1**

$^{13}\text{C}\{^1\text{H}\}$  NMR spectrum of **1** in  $\text{C}_6\text{D}_6$  solution

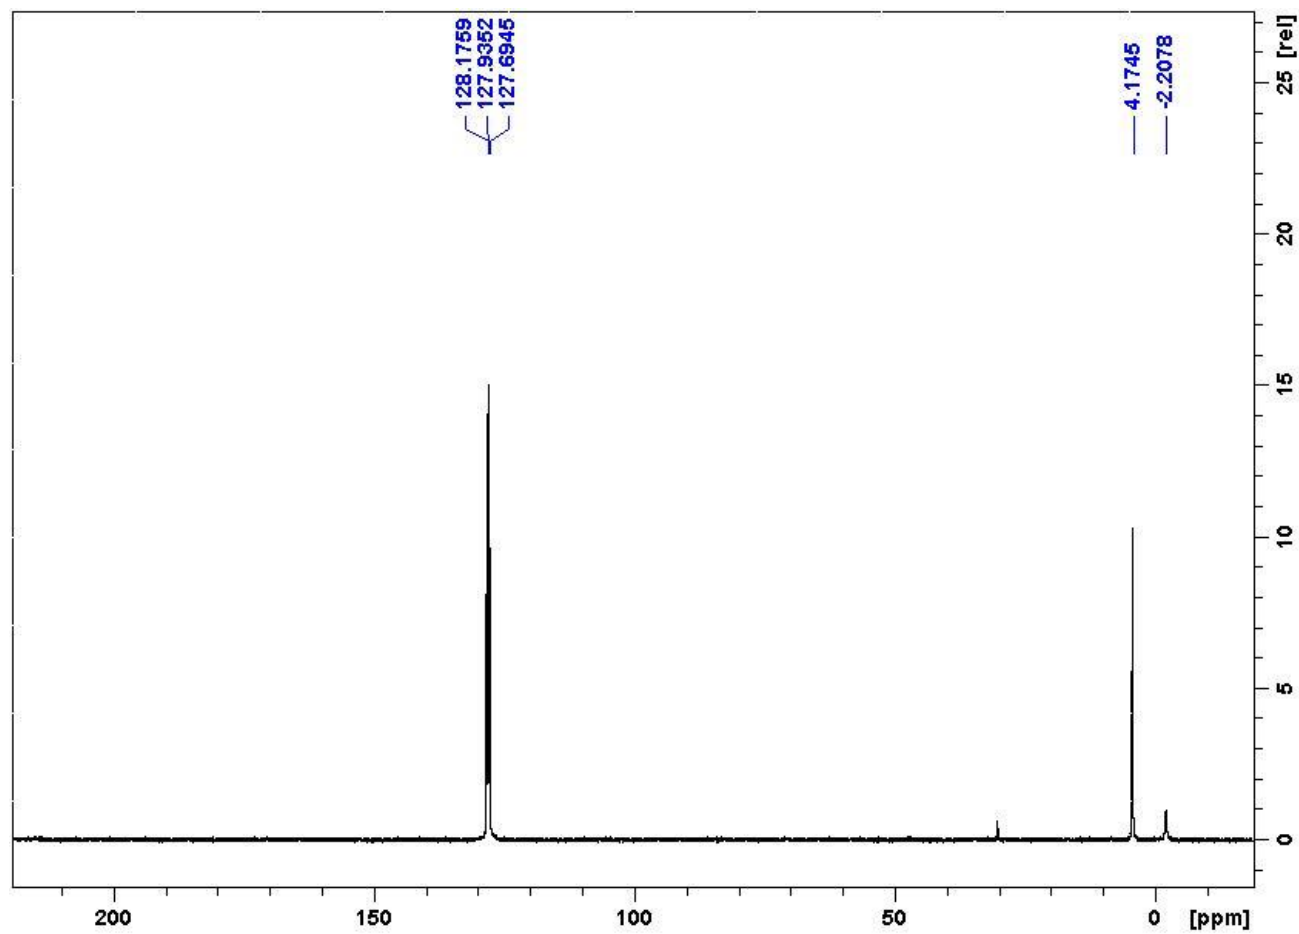

Figure S 2

$^7\text{Li}$  NMR spectrum of **1** in  $\text{C}_6\text{D}_6$  solution

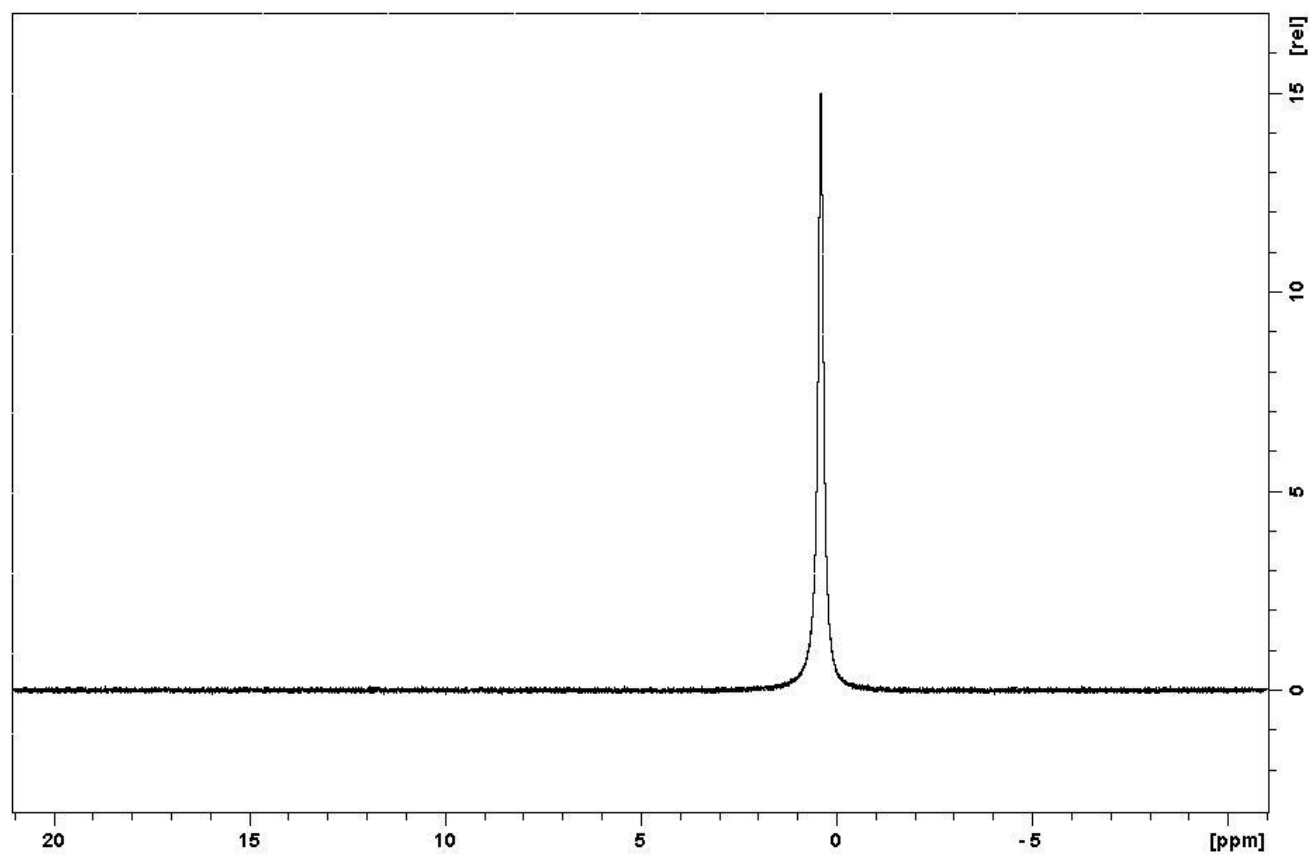

Figure S 3

**$[(\text{THF})\text{LiMgR}_3]_\infty$  (2)**

$^1\text{H}$  NMR spectrum of **2** in  $\text{C}_6\text{D}_6$  solution

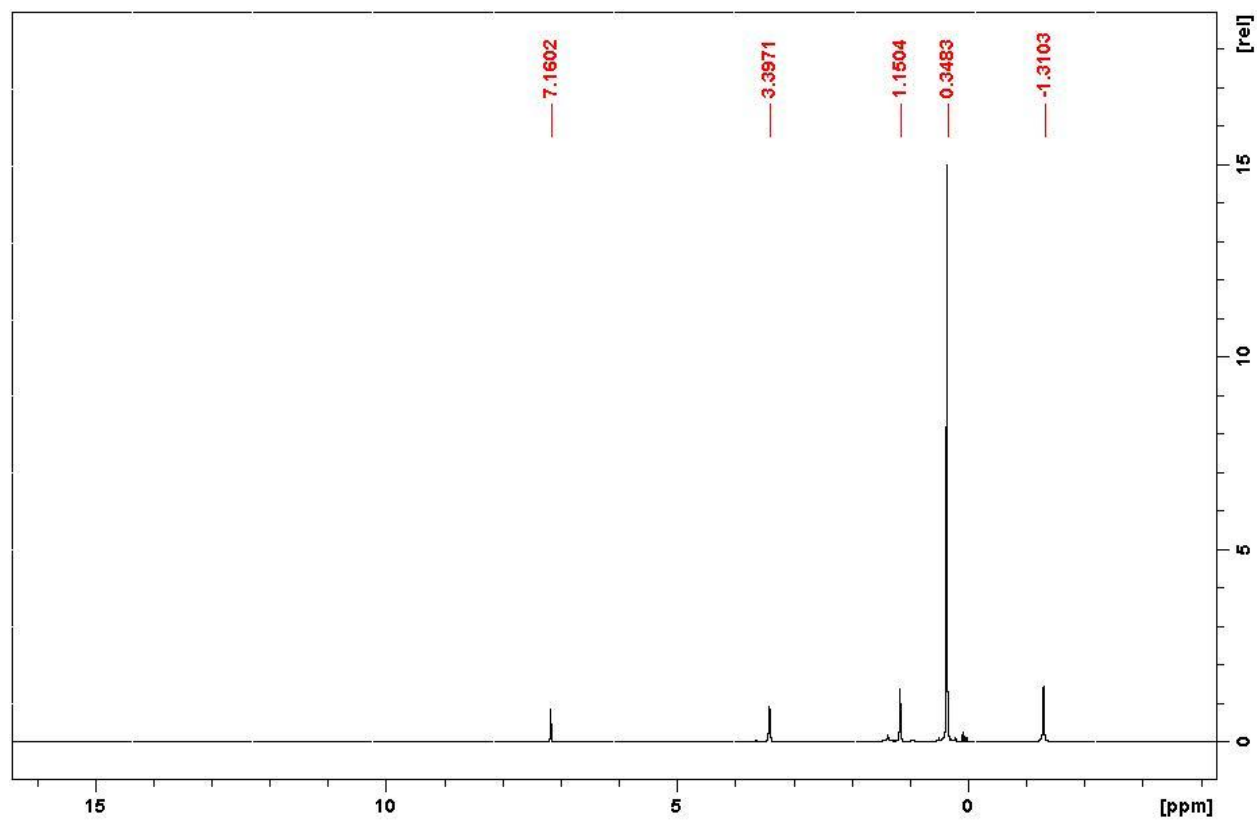

**Figure S 4**

$^{13}\text{C}\{^1\text{H}\}$  NMR spectrum of **2** in  $\text{C}_6\text{D}_6$  solution

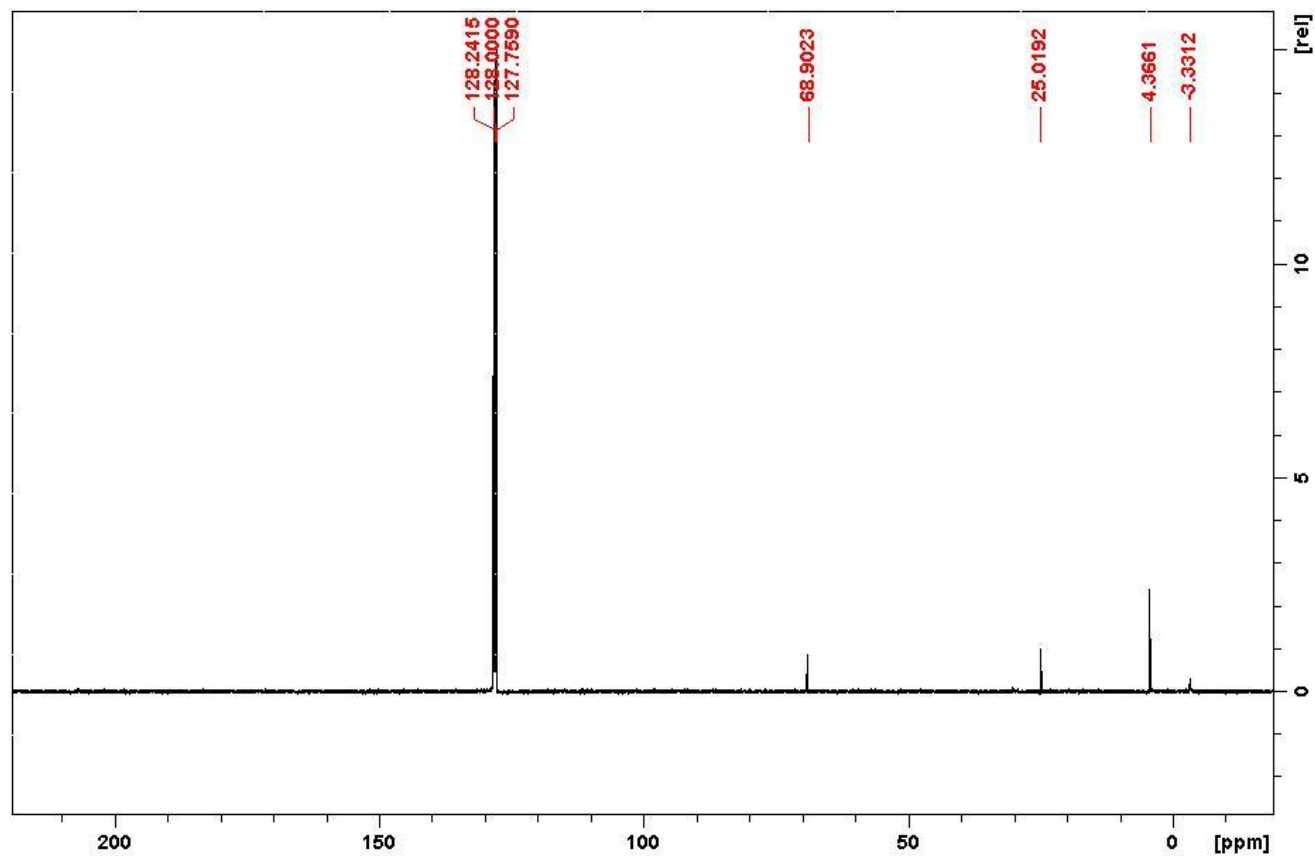

Figure S 5

$^7\text{Li}$  NMR spectrum of **2** in  $\text{C}_6\text{D}_6$  solution

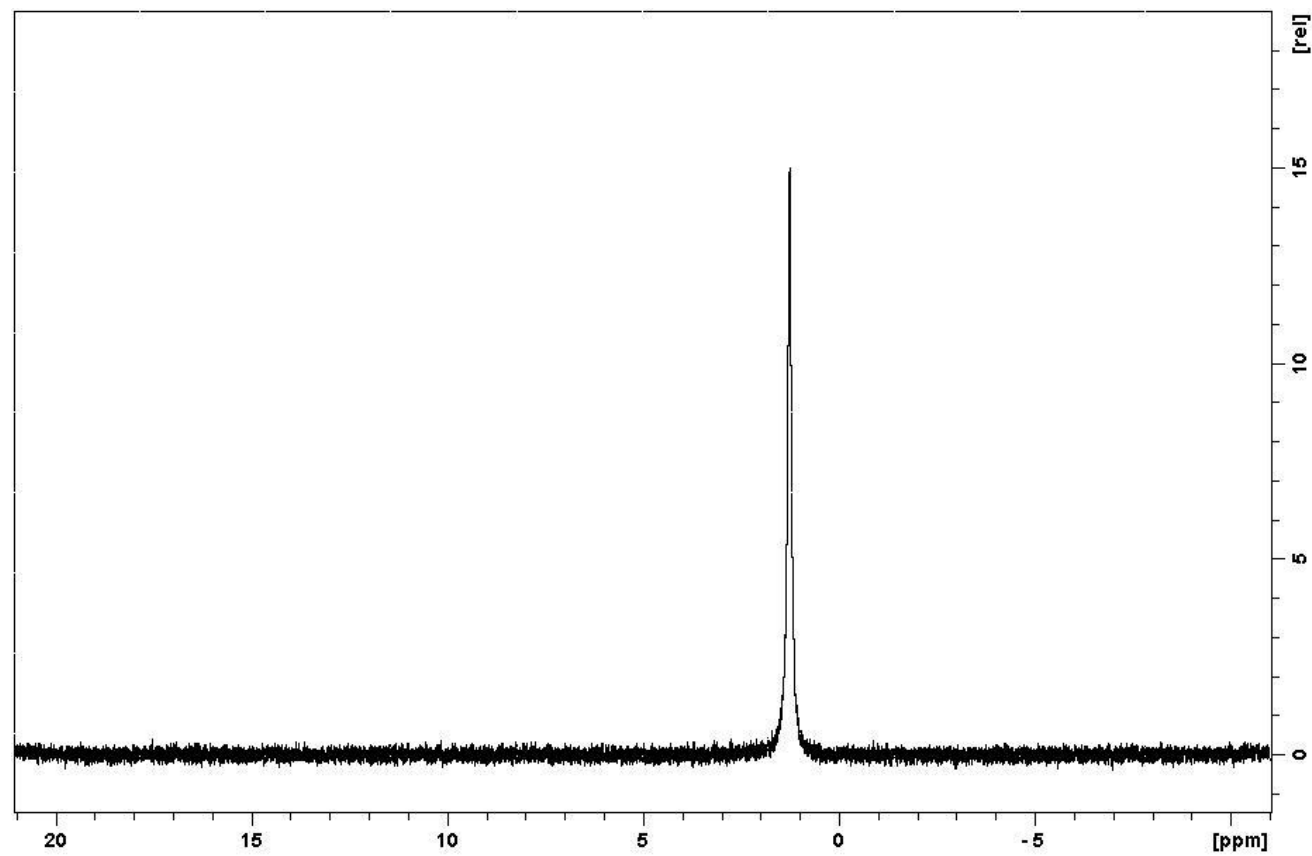

Figure S 6



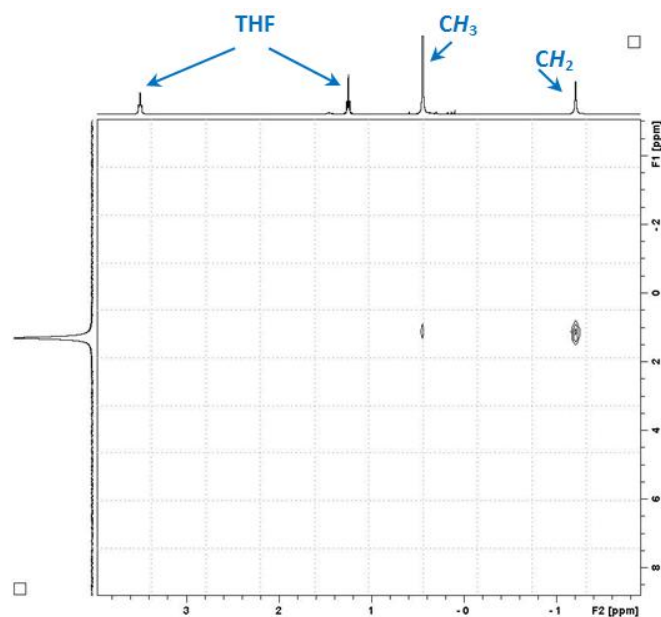

HOESY experiment showing cross-peaks between  $^1\text{H}$  (x-axis) and  $^7\text{Li}$  (y-axis) in **2**.

**Figure S 7**

**[{(dioxane)<sub>2</sub>LiMg(CH<sub>2</sub>SiMe<sub>3</sub>)<sub>3</sub>]<sub>∞</sub>] (**3**)**

$^1\text{H}$  NMR spectrum of **3** in  $\text{C}_6\text{D}_6$  solution

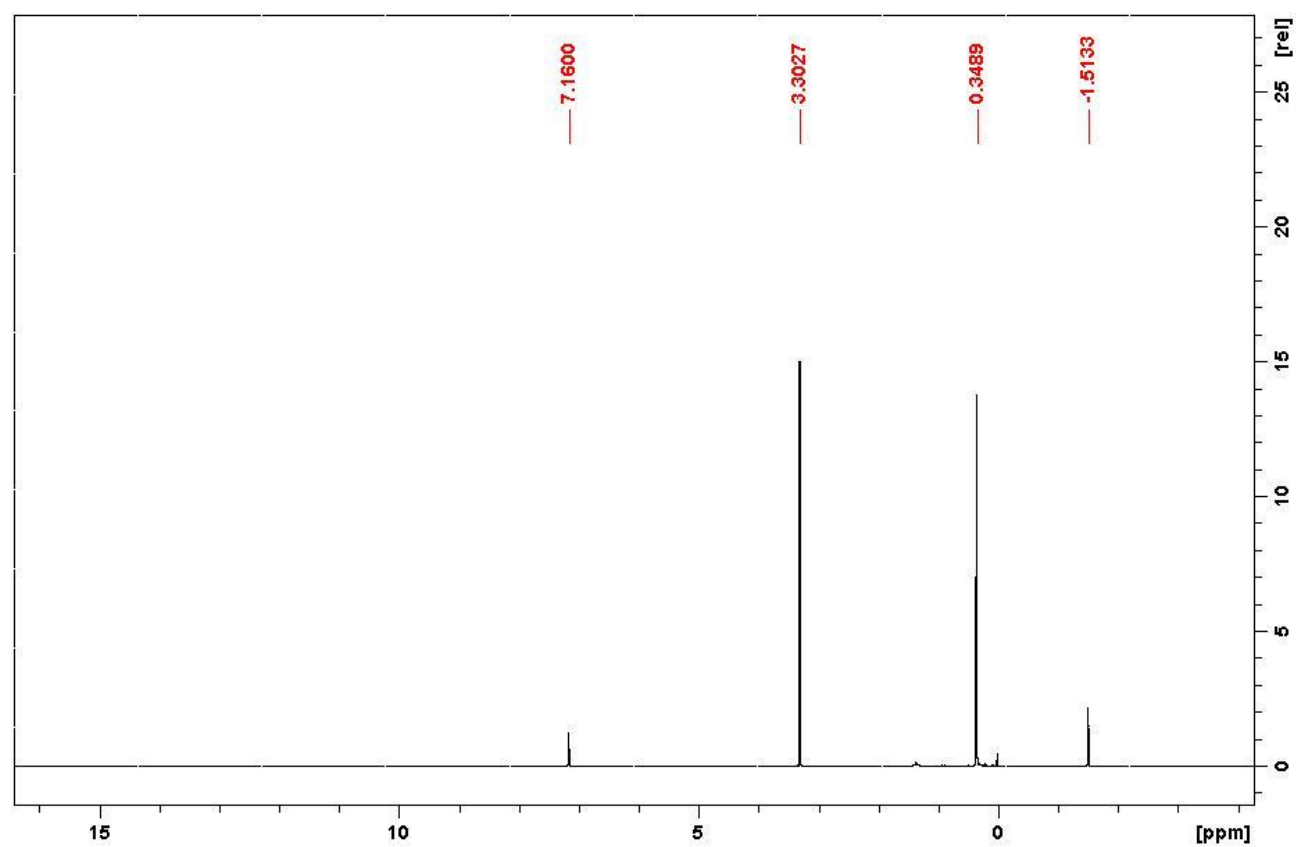

Figure S 8

$^7\text{Li}$  NMR spectrum of **3** in  $\text{C}_6\text{D}_6$  solution

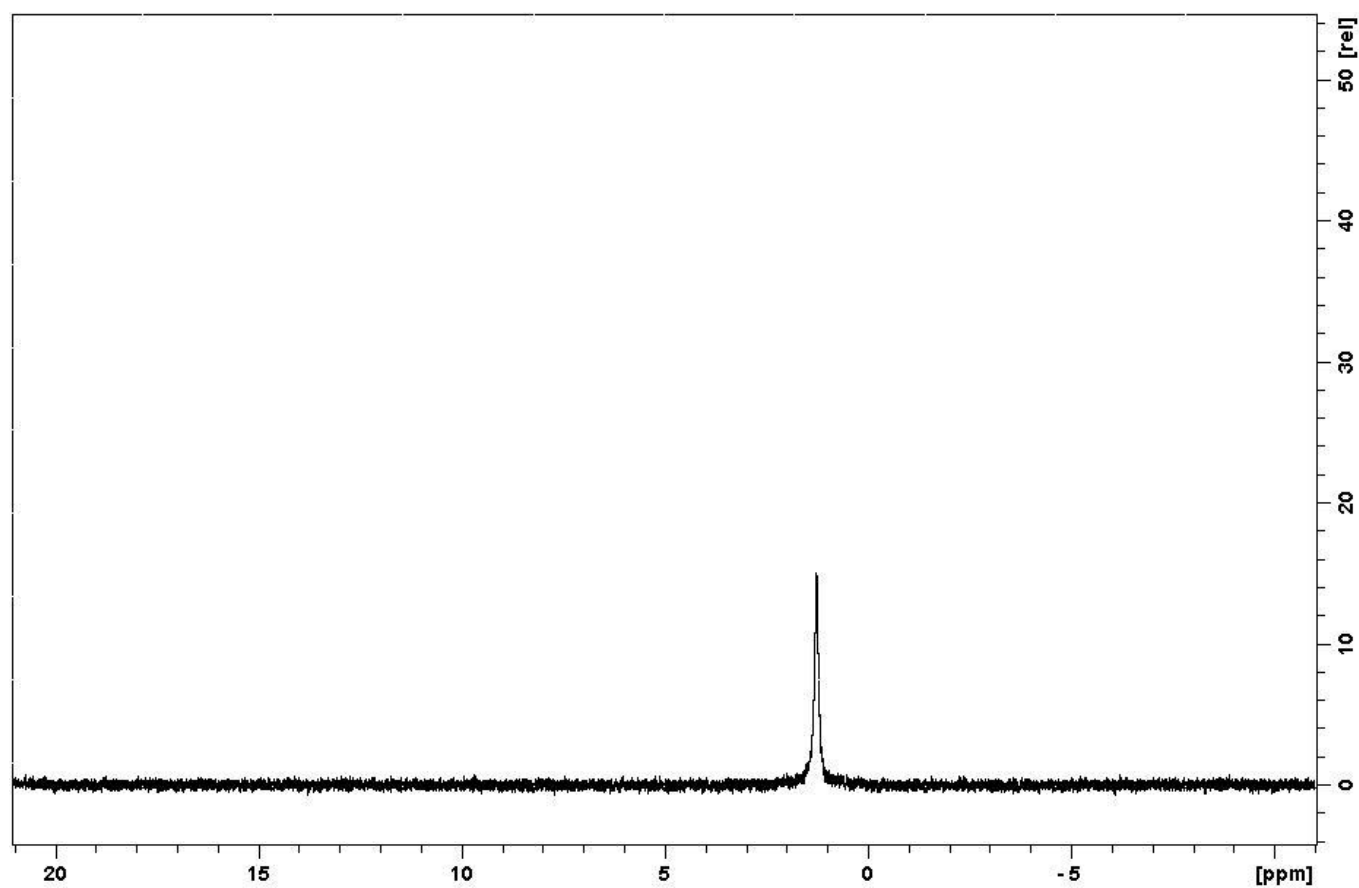

Figure S 9

Variable temperature experiment of **3** in deuterated toluene showing splitting of the M-CH<sub>2</sub> peak at 215 K from the two bridging and one terminal R group (S10a) and the broadening of the dioxane signal (S10b).

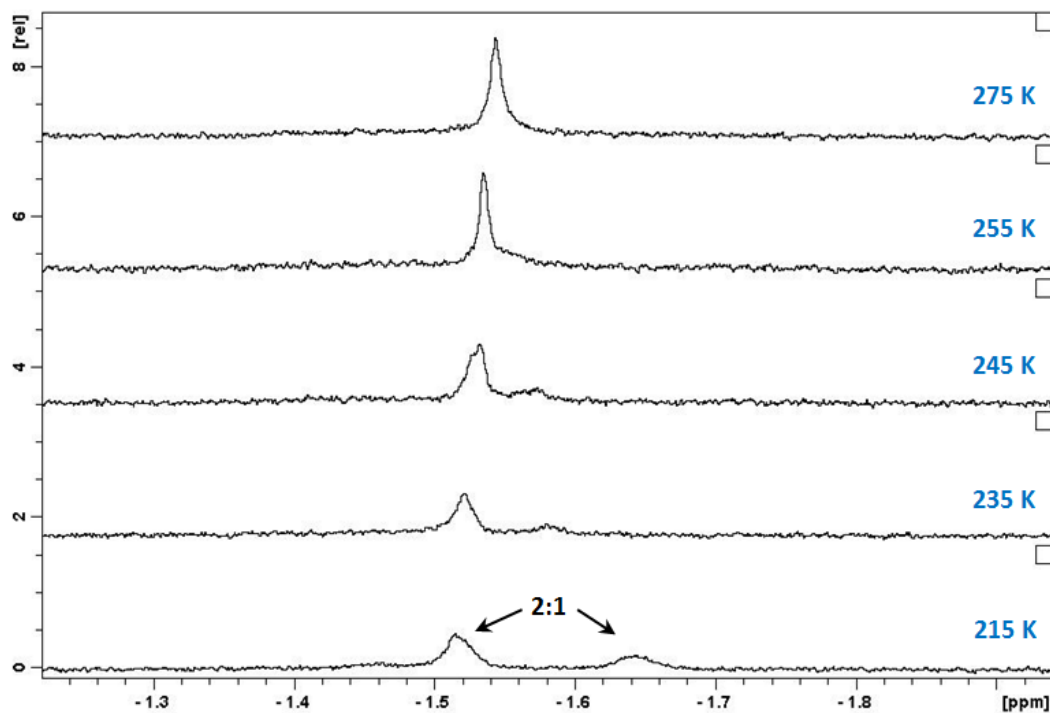

Figure S 10a

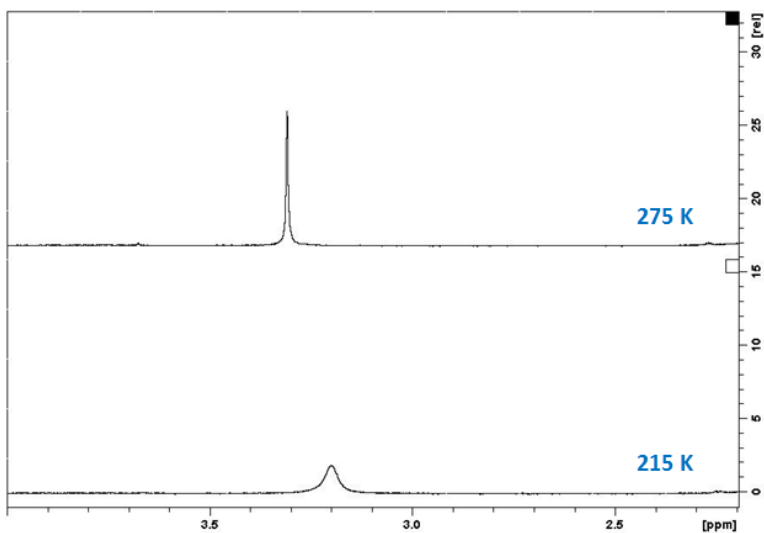

Figure S 10b

**[{(dioxane)Li<sub>2</sub>Mg<sub>2</sub>R<sub>6</sub>}<sub>∞</sub>] (4)**<sup>1</sup>H NMR spectrum of **4** in C<sub>6</sub>D<sub>6</sub> solution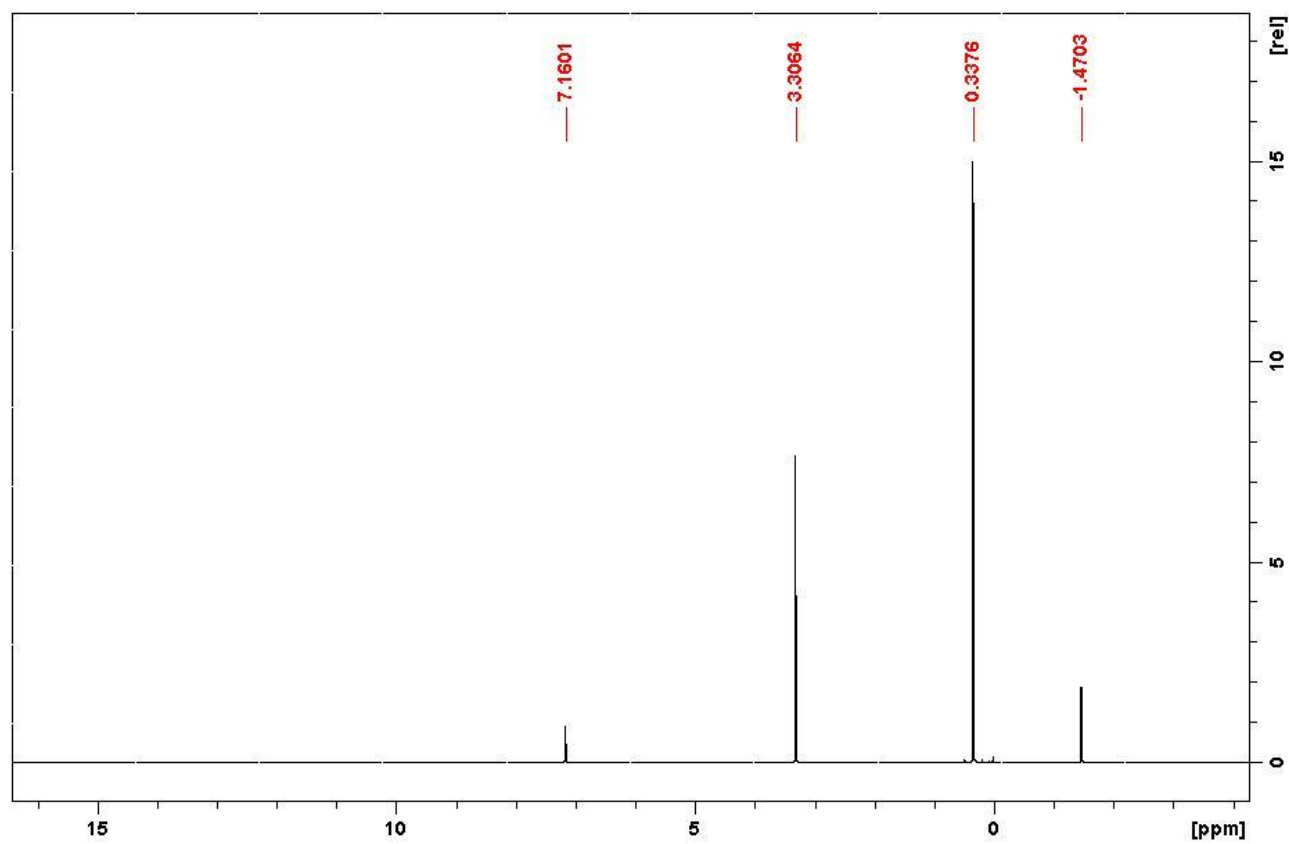**Figure S 11**

Variable temperature experiment of **4** in deuterated toluene showing splitting of the M-CH<sub>2</sub> peak at 215 K from the inequivalent R groups.

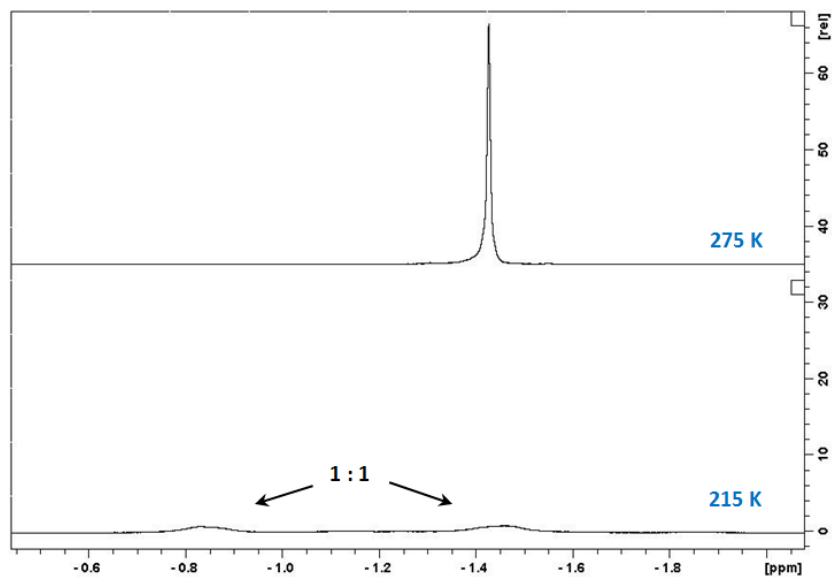

Figure S 12

**[(TMEDA)<sub>2</sub>Li<sub>2</sub>MgR<sub>4</sub>] (5)**<sup>1</sup>H NMR spectrum of **4** in C<sub>6</sub>D<sub>6</sub> solution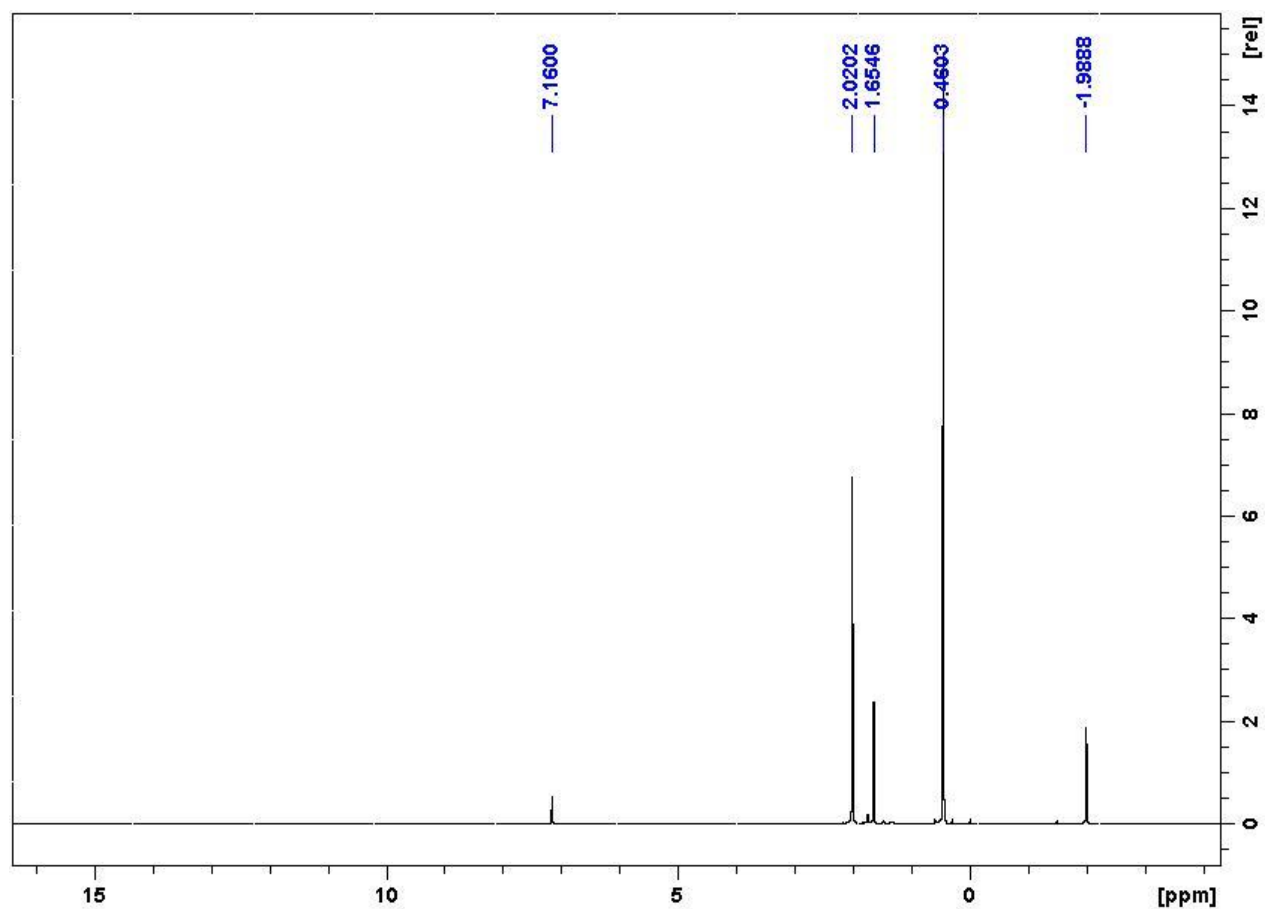**Figure S 13**

$^{13}\text{C}\{^1\text{H}\}$  NMR spectrum of **5** in  $\text{C}_6\text{D}_6$  solution

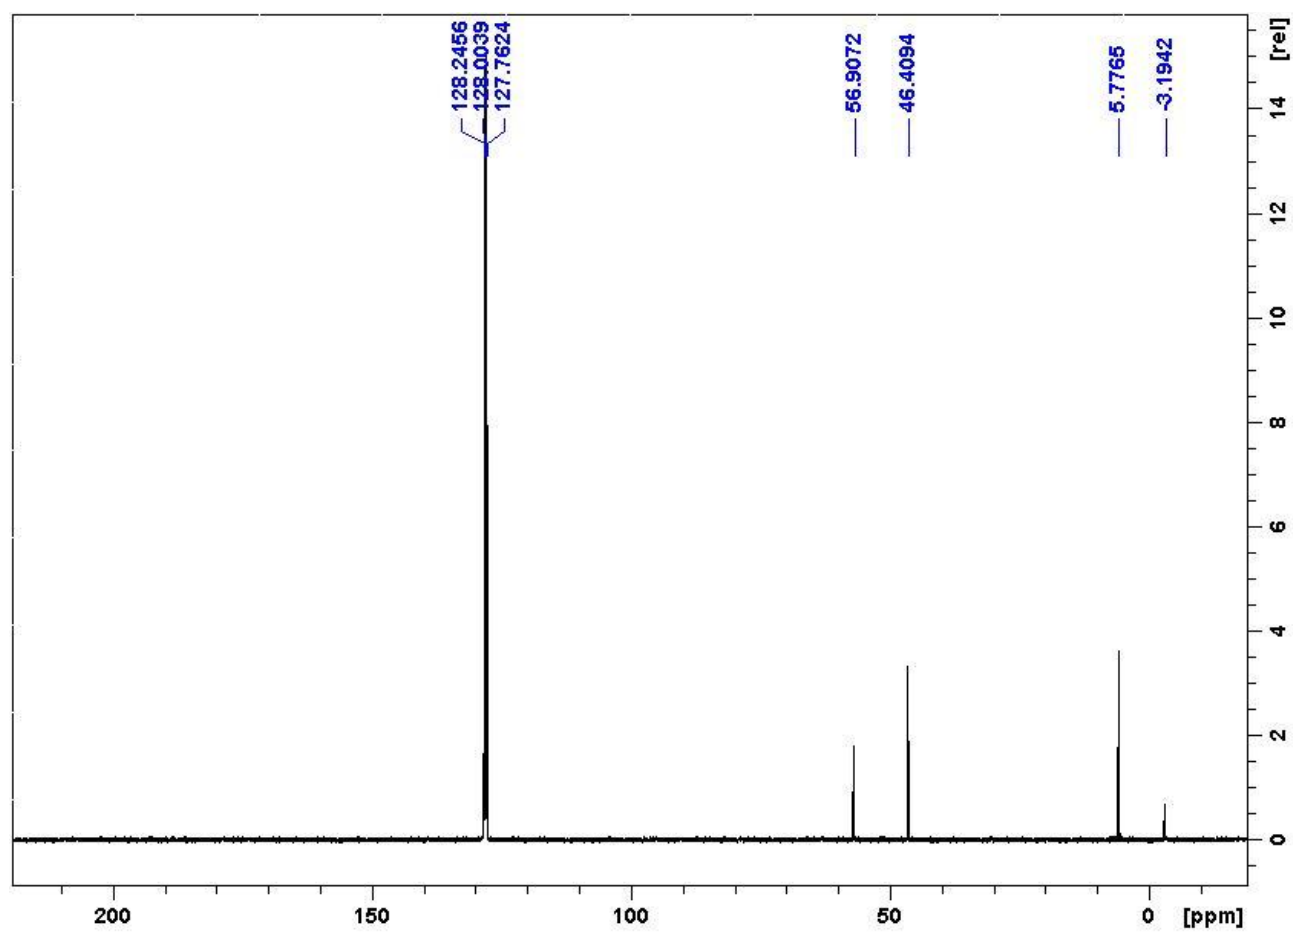

Figure S 14



$^7\text{Li}$  NMR spectrum of **5** in  $\text{C}_6\text{D}_6$  solution

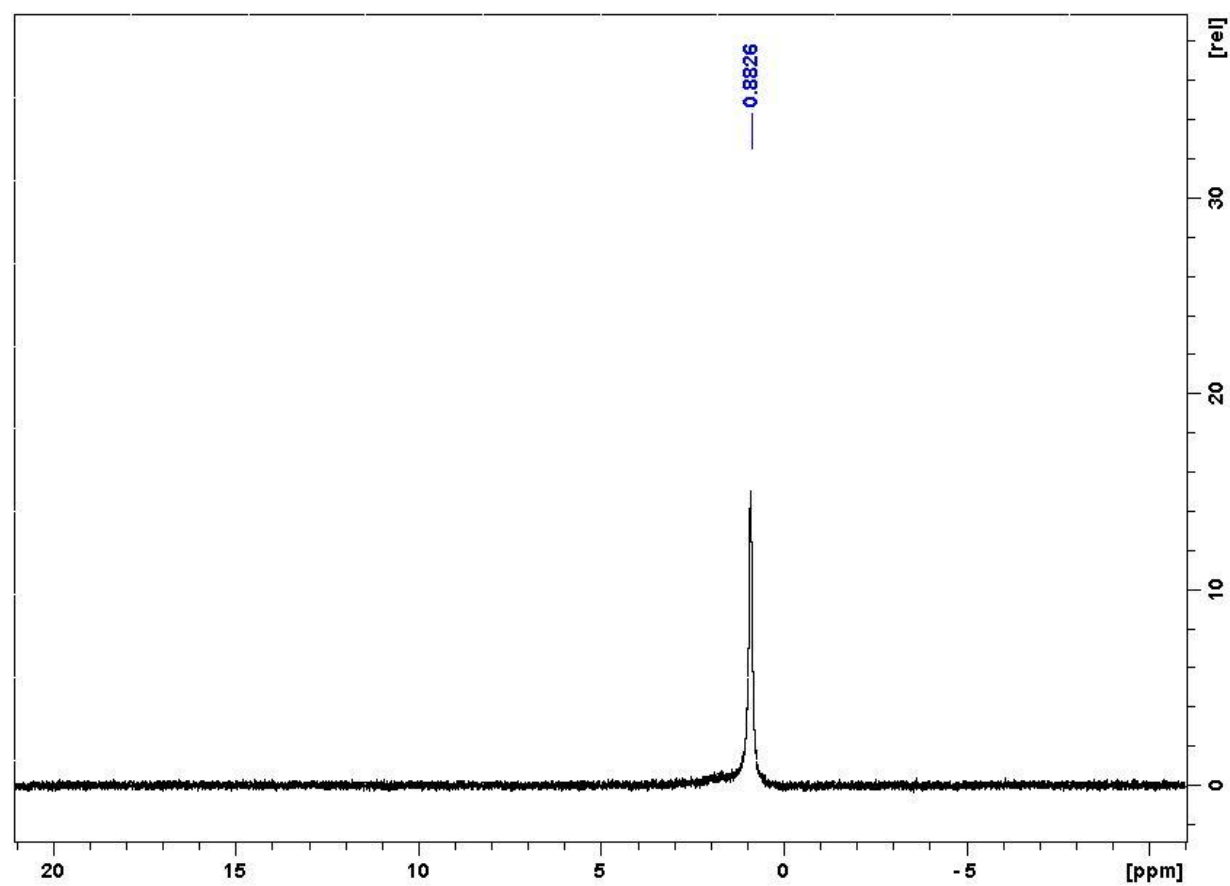

Figure S 15

**[(PMDETA)LiMgR<sub>3</sub>] (6)**<sup>1</sup>H NMR spectrum of **6** in C<sub>6</sub>D<sub>6</sub> solution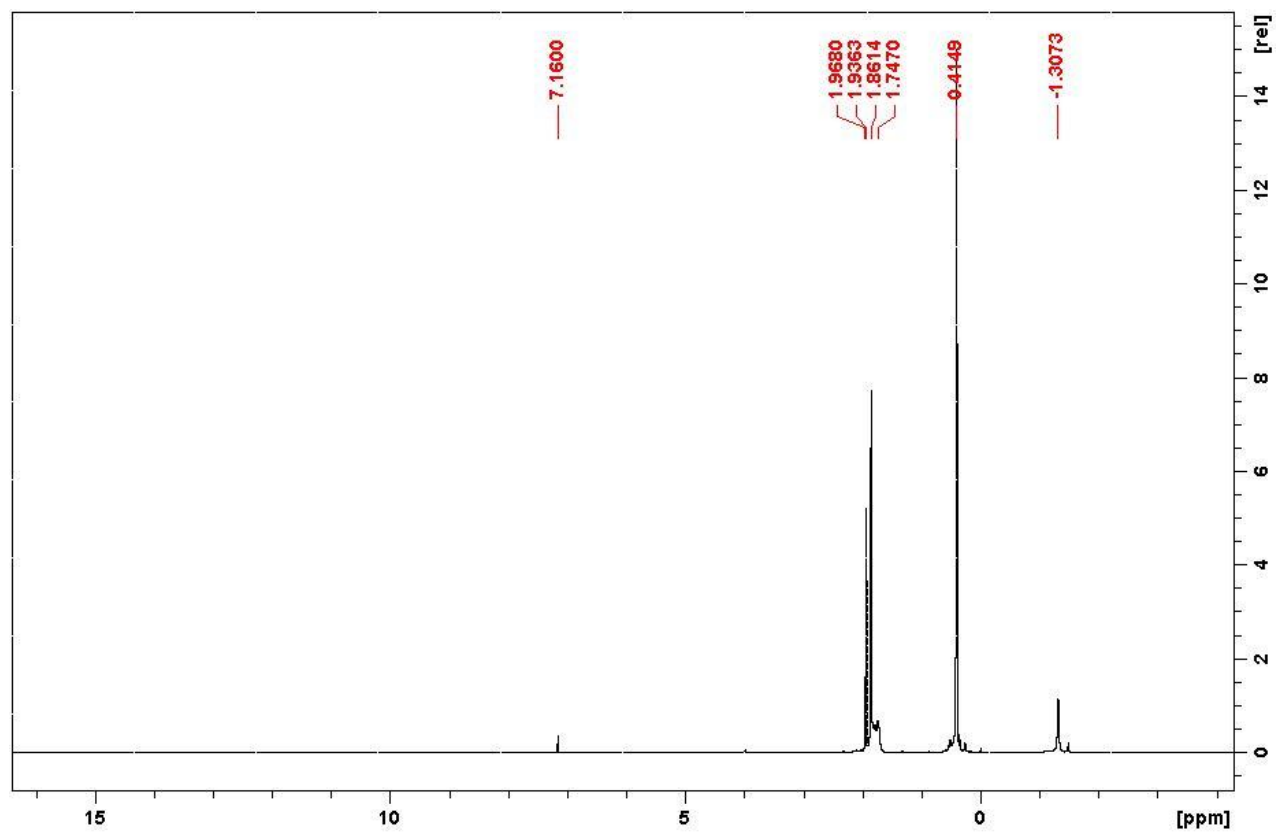**Figure S 16**

$^{13}\text{C}\{^1\text{H}\}$  NMR spectrum of **6** in  $\text{C}_6\text{D}_6$  solution

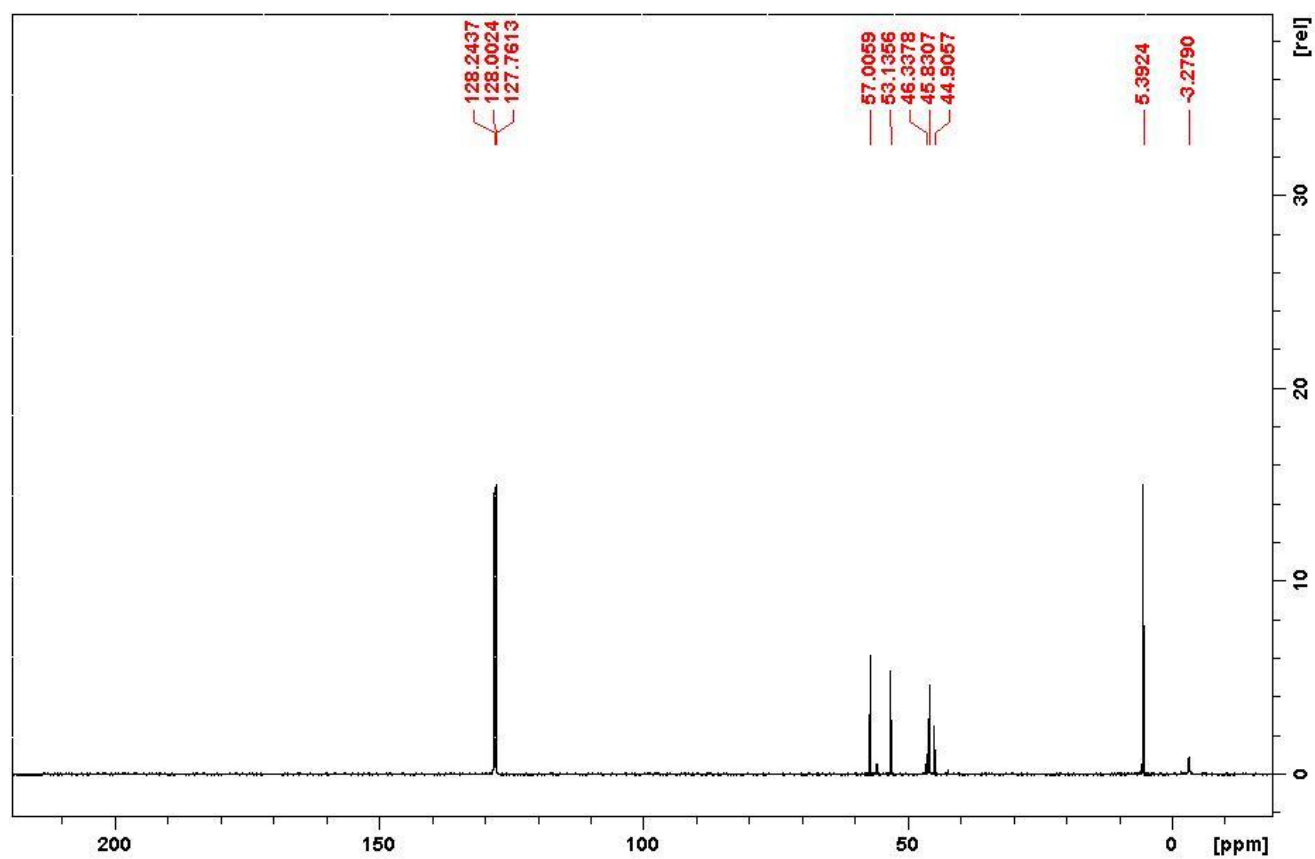

Figure S 17

$^7\text{Li}$  NMR spectrum of **6** in  $\text{C}_6\text{D}_6$  solution

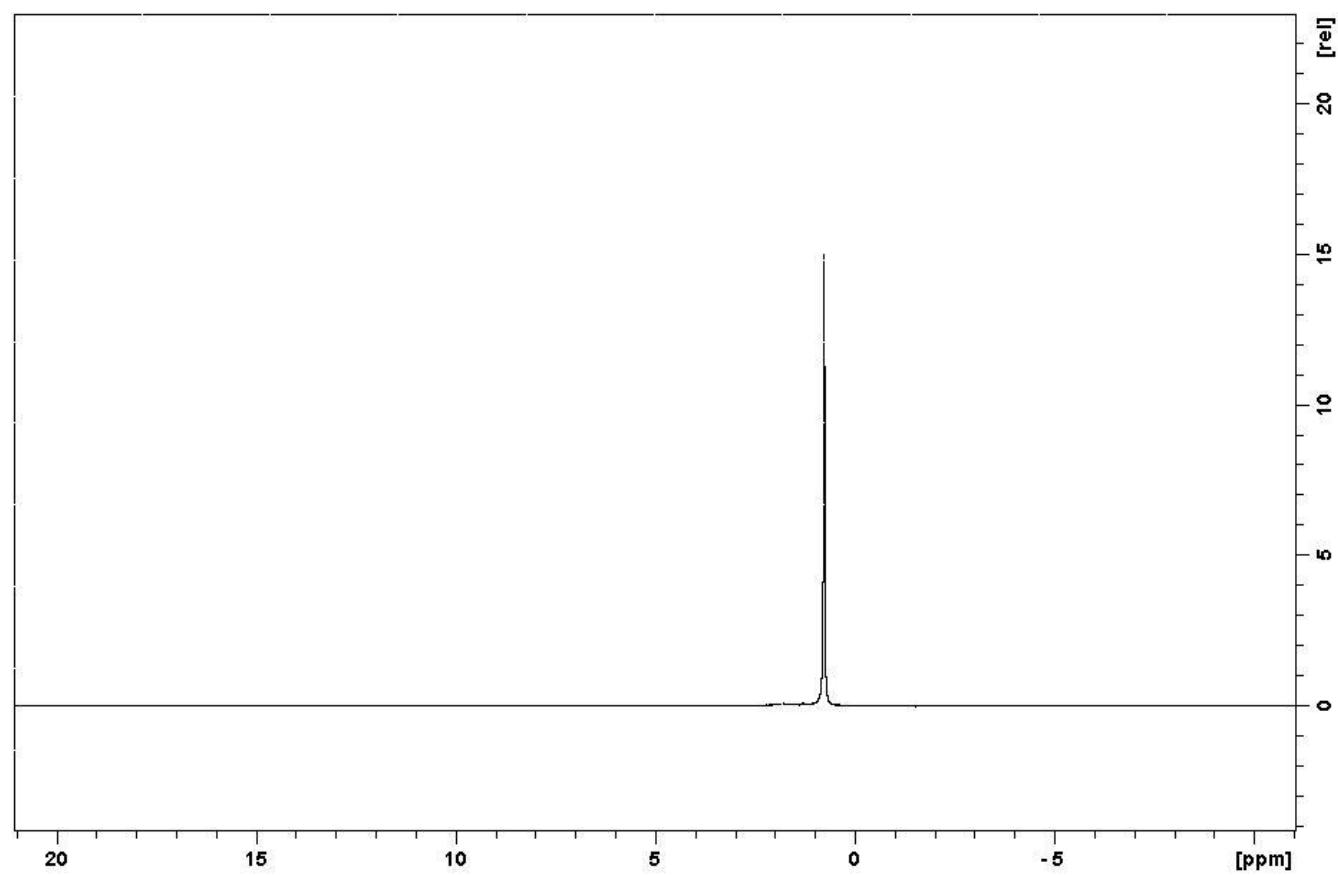

Figure S 18

$[\{(\text{PMDETA})_2\text{Li}_2\text{MgR}_3\}^+\{\text{Mg}_3\text{R}_6(\text{OR})\}^-] \text{ (7)}$ 

$^1\text{H}$  NMR spectrum of **7** in  $\text{C}_6\text{D}_6$  solution

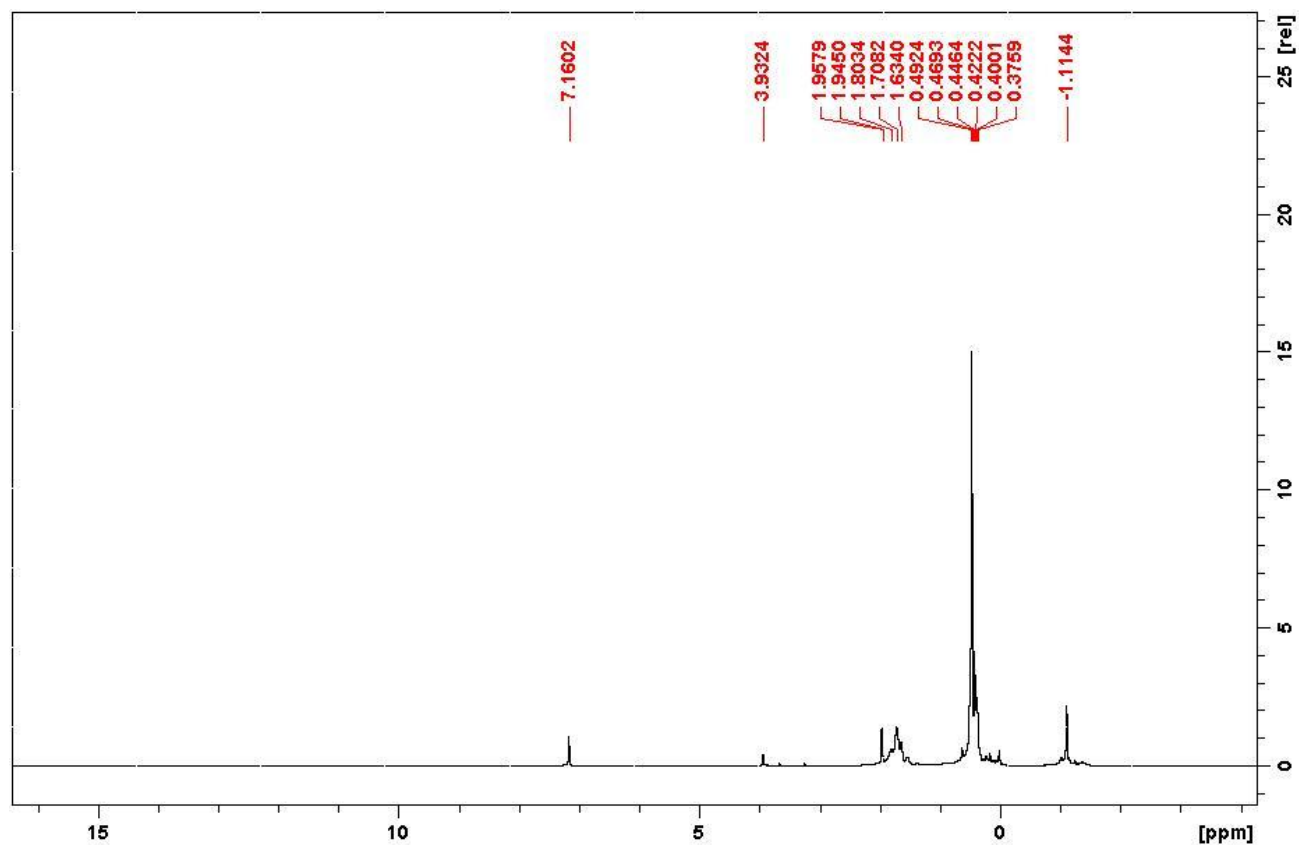

Figure S 19

$^7\text{Li}$  NMR spectrum of **7** in  $\text{C}_6\text{D}_6$  solution

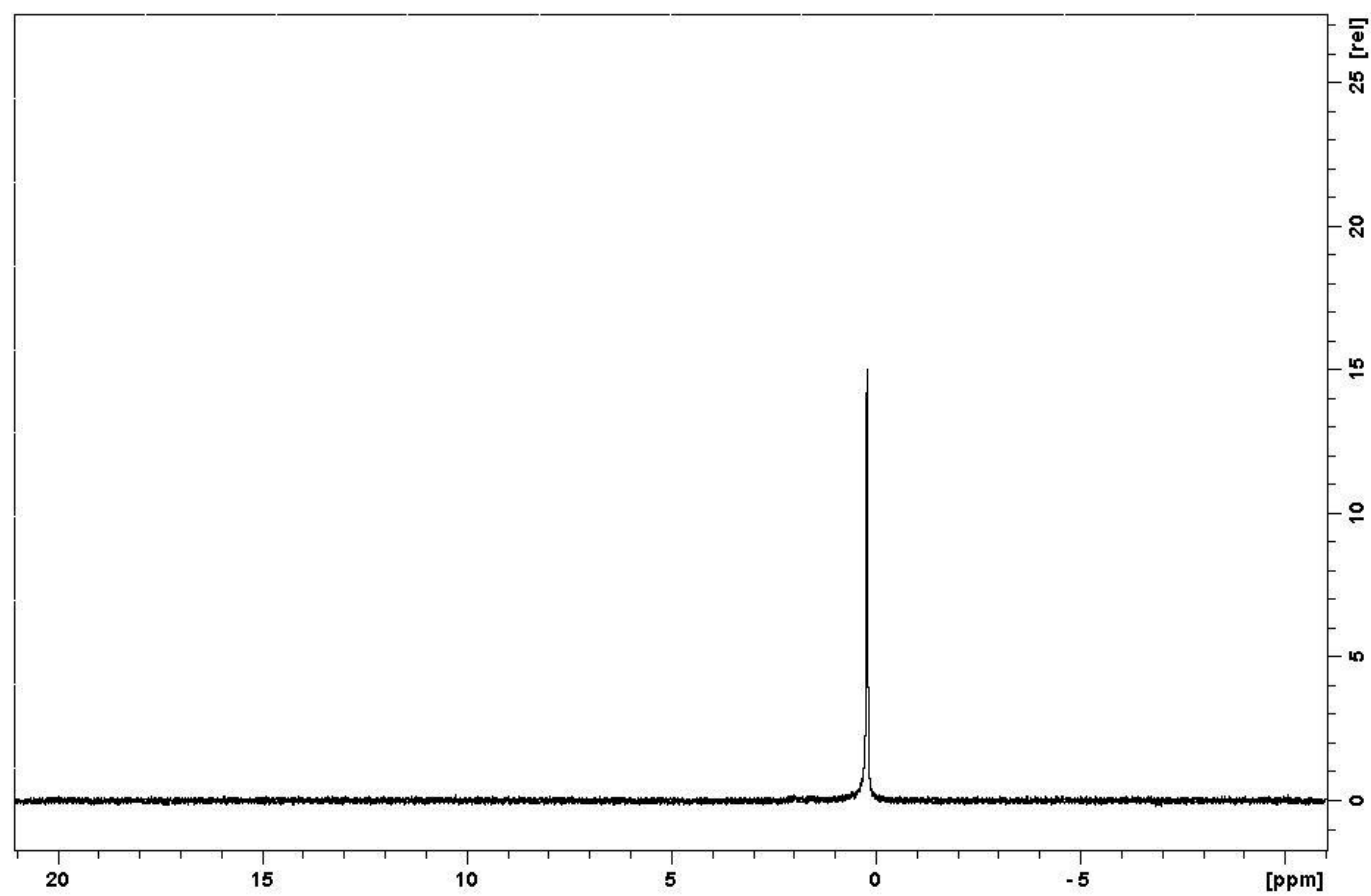

Figure S 20

## DOSY Experiments

$^1\text{H}$  NMR spectrum of  $[\text{LiMg}(\text{CH}_2\text{SiMe}_3)_3(\text{THF})]$  (**2**), TPhN, PhN and TMS at 27 °C in  $\text{C}_6\text{D}_6$  (traces of grease are also observed).

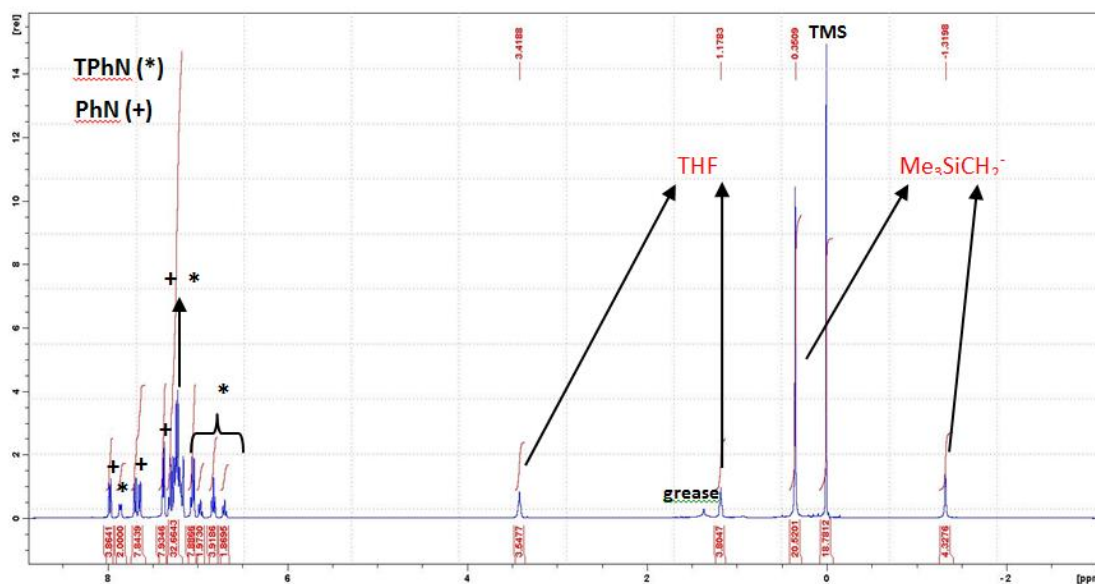

Figure S 21

$^1\text{H}$ -DOSY NMR spectrum of **2**, and standards TPhN, PhN and TMS in  $\text{C}_6\text{D}_6$  at 298 K (some traces of grease also observed)

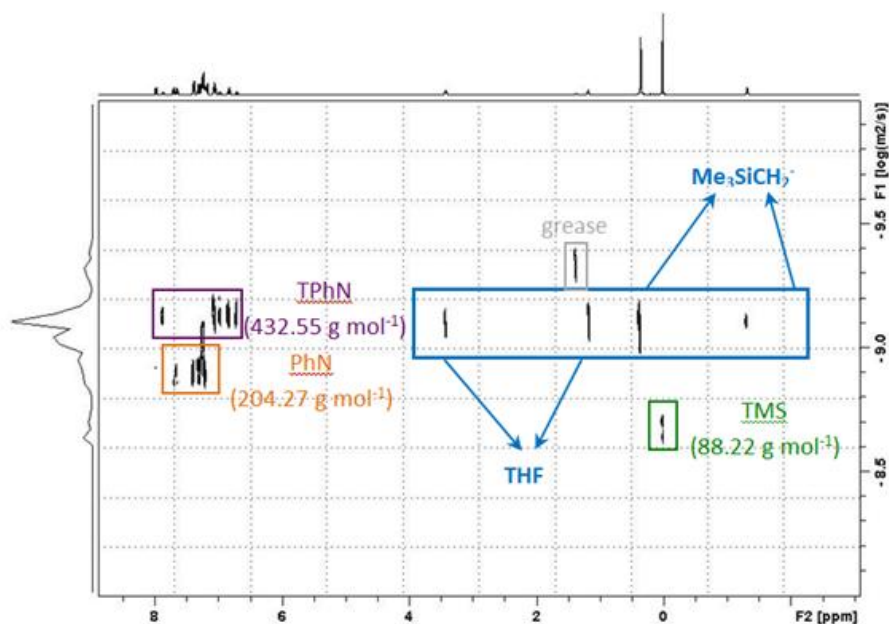

Figure S 22

log  $D$  – log FW representation from the  $^1\text{H}$ -DOSY data obtained for the mixture of **2**, TPhN, PhN and TMS in  $\text{C}_6\text{D}_6$  (data for the components of **2** is not included).

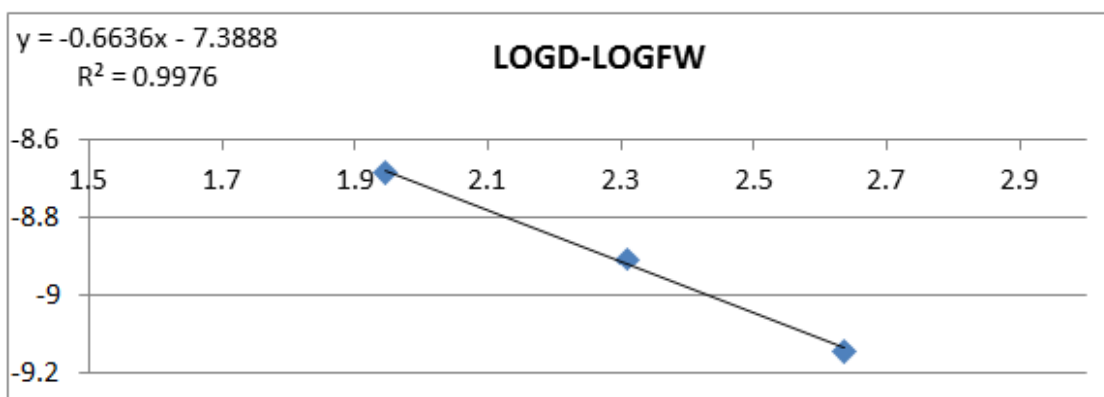

**Figure S 23**

Possible species of  $\text{LiMg}(\text{CH}_2\text{SiMe}_3)_3(\text{THF})$  (**2**) in  $\text{C}_6\text{D}_6$  with errors (in brackets) respect to the FW value predicted through the DOSY study.

**FW predicted for  $\text{Me}_3\text{SiCH}_2\text{-/THF}$  in  $\text{C}_6\text{D}_6 = 410.37 \text{ (g mol}^{-1}\text{)}$**

- |          |                                                                                                                                                                                                 |
|----------|-------------------------------------------------------------------------------------------------------------------------------------------------------------------------------------------------|
| <b>A</b> | <b><math>[\text{LiMg}(\text{CH}_2\text{SiMe}_3)_3(\text{THF})]_3</math></b><br>$\text{C}_{48}\text{H}_{123}\text{Mg}_3\text{Li}_3\text{O}_3\text{Si}_9$ 1095.00 g mol <sup>-1</sup> (63 %)      |
| <b>B</b> | <b><math>[\text{LiMg}(\text{CH}_2\text{SiMe}_3)_3(\text{THF})]_2</math></b><br>$\text{C}_{32}\text{H}_{82}\text{Mg}_2\text{Li}_2\text{O}_2\text{Si}_6$ 730.00 g mol <sup>-1</sup> (44 %)        |
| <b>C</b> | <b><math>[\text{LiMg}(\text{CH}_2\text{SiMe}_3)_3(\text{THF})] \cdot \text{C}_6\text{D}_6</math></b><br>$\text{C}_{22}\text{H}_{41}\text{D}_6\text{MgLiOSi}_3$ 449.15 g mol <sup>-1</sup> (9 %) |
| <b>D</b> | <b><math>[\text{LiMg}(\text{CH}_2\text{SiMe}_3)_3(\text{THF})]</math></b><br>$\text{C}_{16}\text{H}_{41}\text{MgLiOSi}_3$ 364.00 g mol <sup>-1</sup> (- 13 %)                                   |

**Figure S 24**



$^1\text{H}$ -DOSY NMR spectrum of  $[(\text{dioxane})_2\text{LiMg}(\text{CH}_2\text{SiMe}_3)_3]$  (**3**), TPhN, PhN and TMS at 27 °C in  $\text{C}_6\text{D}_6$  (signal intensity of the  $\text{MCH}_2$  cross point was increased for presentational purposes).

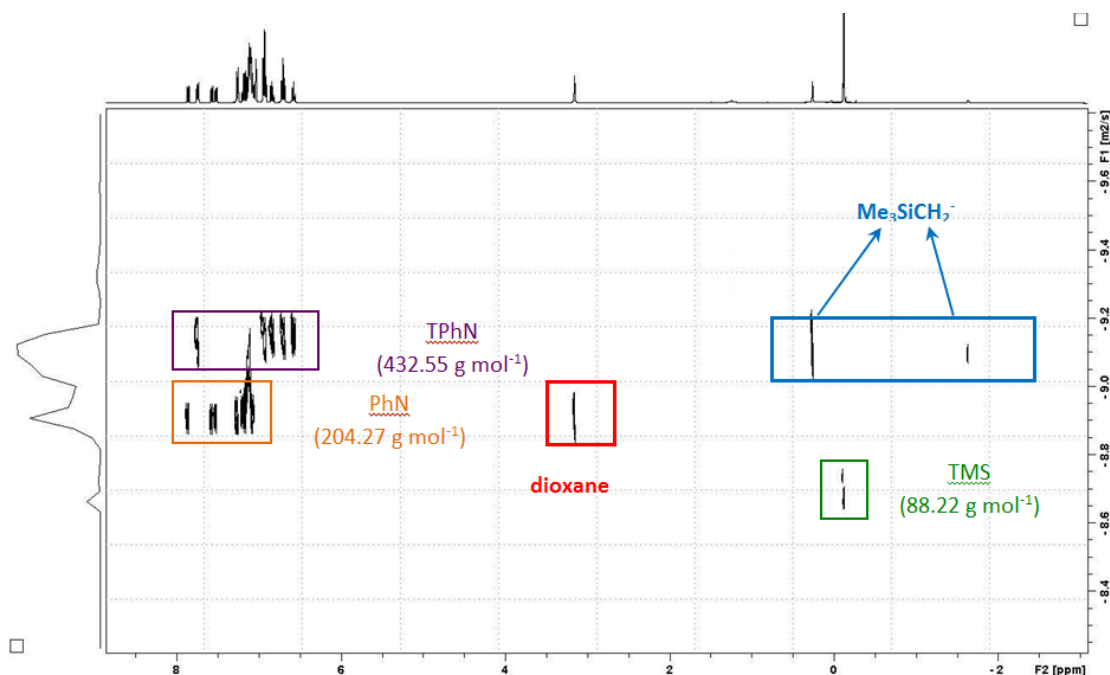

**Figure S 25**

$\log D - \log \text{FW}$  representation from the  $^1\text{H}$ -DOSY data obtained for the mixture of **3**, TPhN, PhN and TMS in  $\text{C}_6\text{D}_6$  (data for the components of **3** is not included).

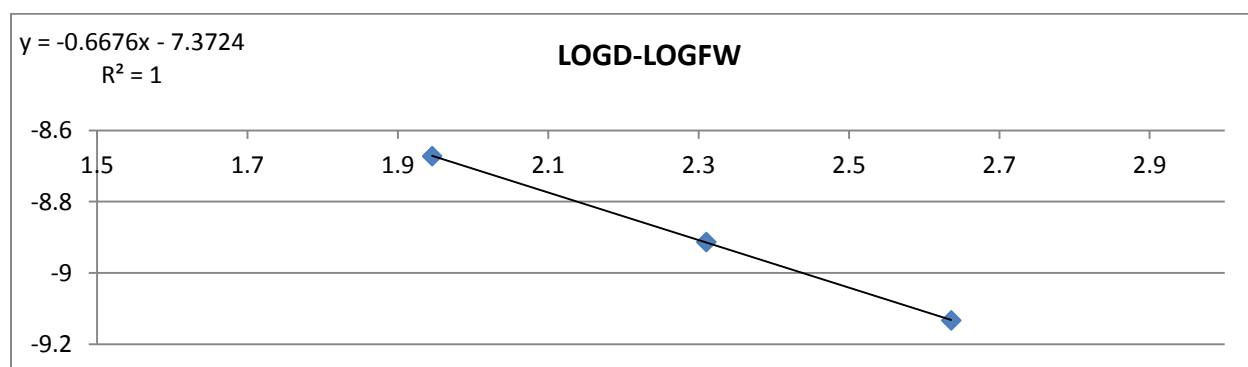

**Figure S 26**

$^1\text{H}$ -DOSY NMR spectrum of  $[(\text{dioxane})\text{Li}_2\text{Mg}_2(\text{CH}_2\text{SiMe}_3)_6]$  (**4**), TPhN, PhN and TMS at 27 °C in  $\text{C}_6\text{D}_6$ .

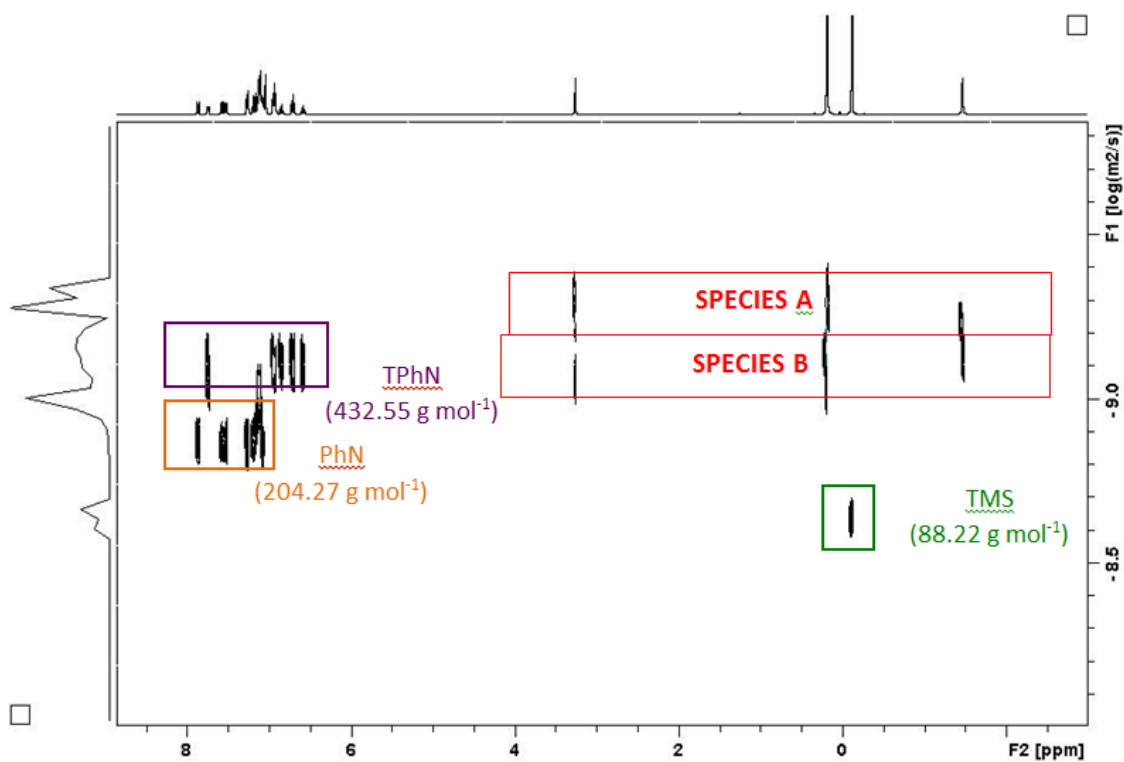

Figure S 27

$^1\text{H}$  NMR spectrum of **4** in  $\text{d}_8$ -toluene solution at 298 K

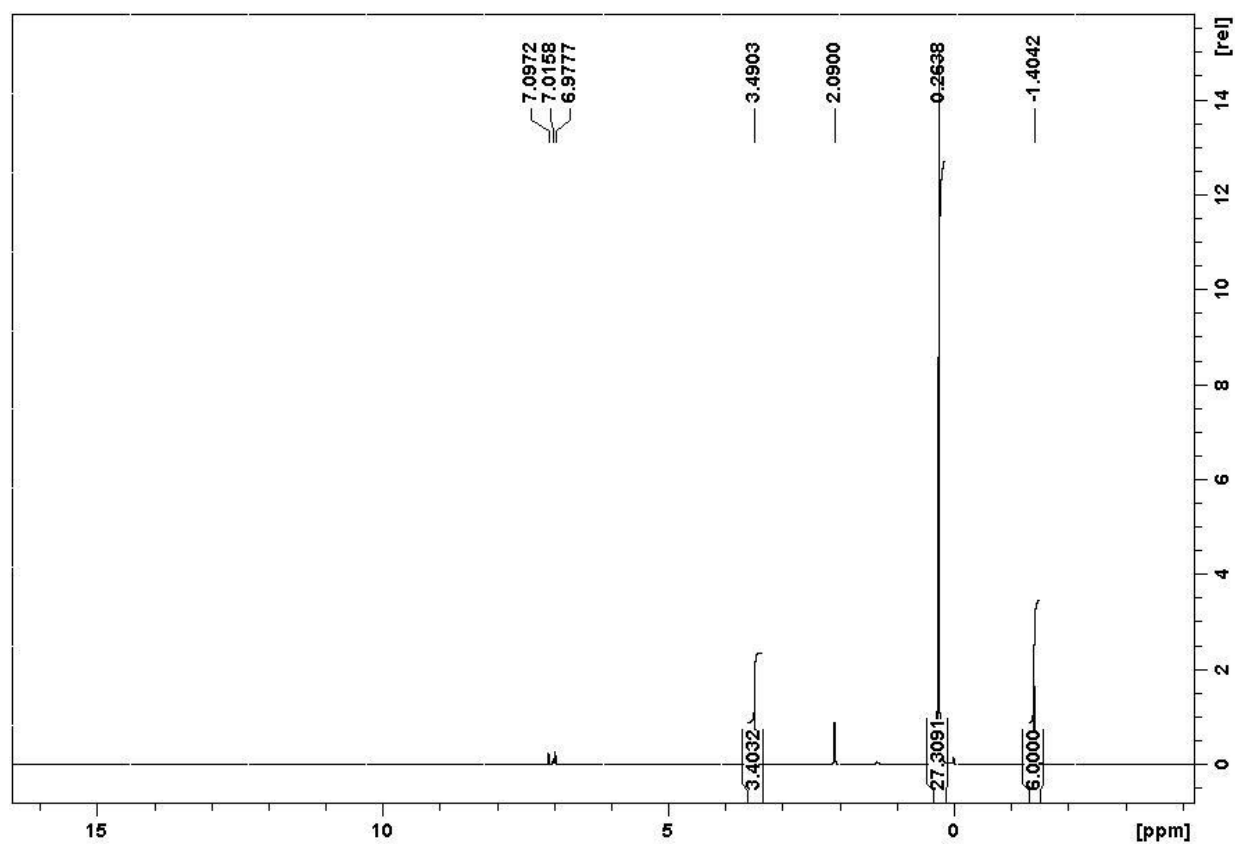

Figure S 28

$^1\text{H}$  NMR spectrum of **4** in  $\text{d}_8$ -toluene solution at 270 K

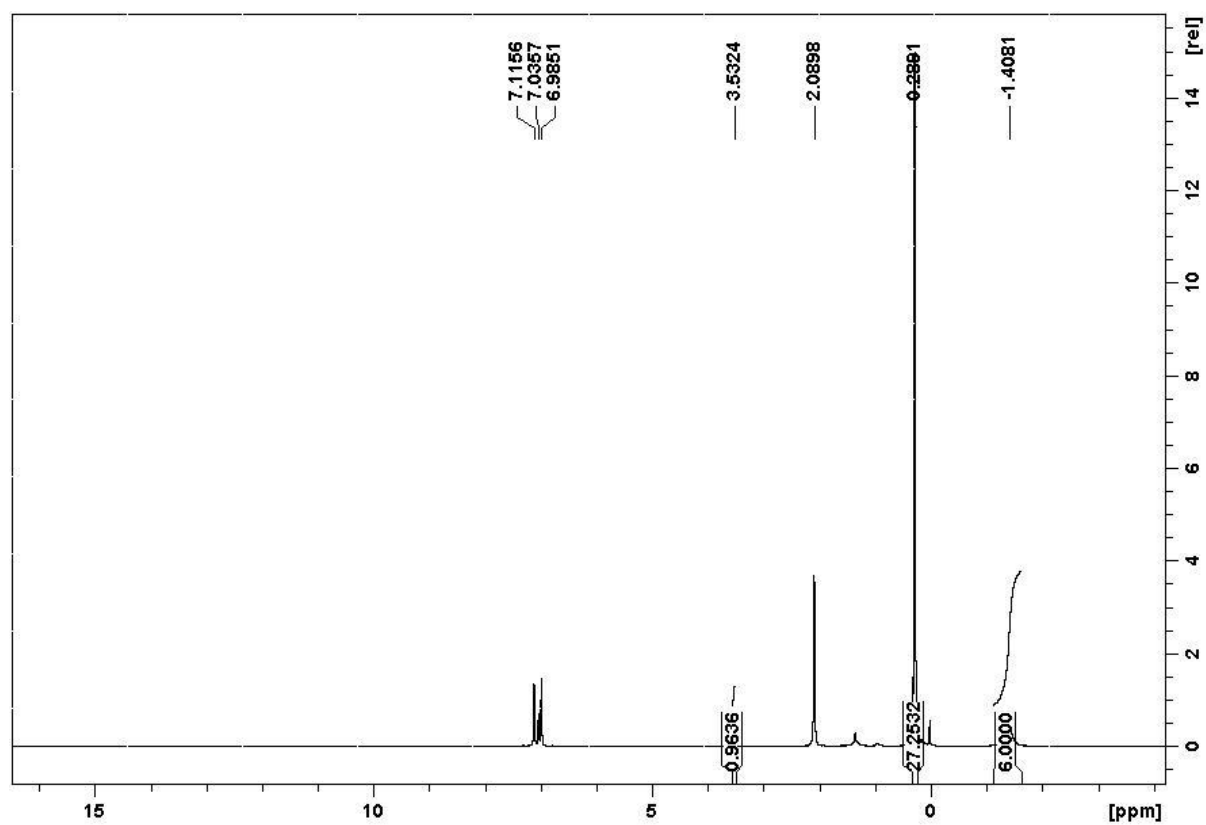

Figure S 29

$^1\text{H}$ -DOSY NMR spectrum of dioxane, TPhN, PhN and TMS at 27 °C in  $\text{C}_6\text{D}_6$  and  $\log D - \log \text{FW}$  representation from the  $^1\text{H}$ -DOSY data obtained for the mixture of TPhN, PhN and TMS in  $\text{C}_6\text{D}_6$ .

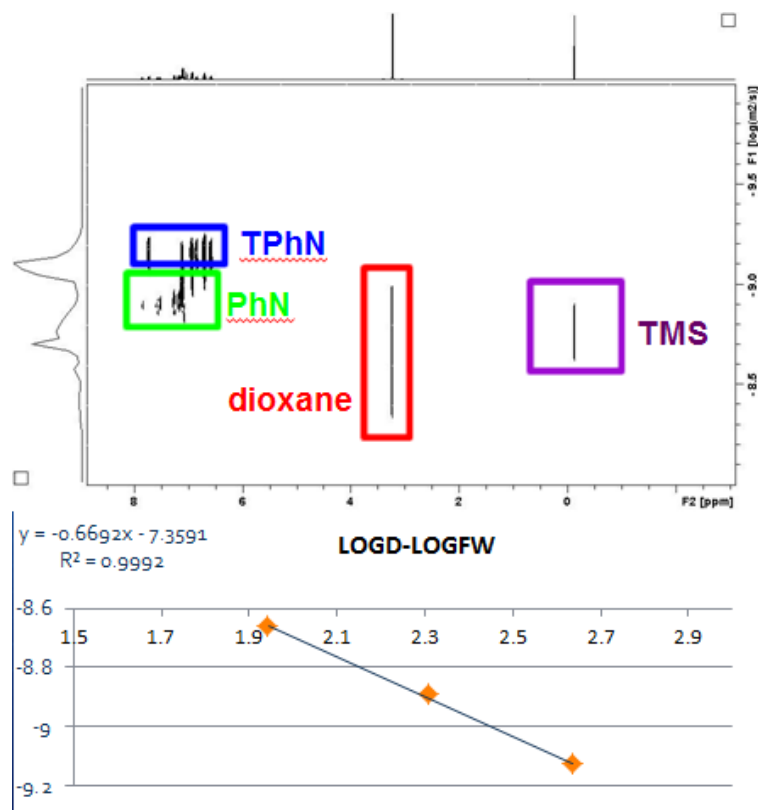

Figure S 30
